# Supplementary material for: Fused arene-functionalized polyhedral oligomeric silsesquioxanes as thermoelectric materials
Source: Royal Society of Chemistry journal article supplement (doi:10.1039/c5ra00183h), 2015-01-01
Supplement: c5ra00183h1.pdf [file c5ra00183h1.pdf]

## Supporting Information

### Fused Arenes-Functionalized Polyhedral Oligomeric Silsesquioxanes as Thermoelectric Materials

Paige Huzyak, John Ferguson, Jeremiah Sharpsteen, Lan Xu, Soundaram Jeevarathinam Ananthakrishnan,<sup>a</sup> and Hemali Rathnayake\*

*\*Department of Chemistry, Western Kentucky University, Bowling Green, KY 42101*

\* Corresponding authors. Tel.: +1-270-745-6238; fax: +1-270-745-5361.

E-mail address: [hemali.rathnayake@wku.edu](mailto:hemali.rathnayake@wku.edu) (Hemali Rathnayake).

**Figure S1:** FT-IR spectrum of POSS-ANT.

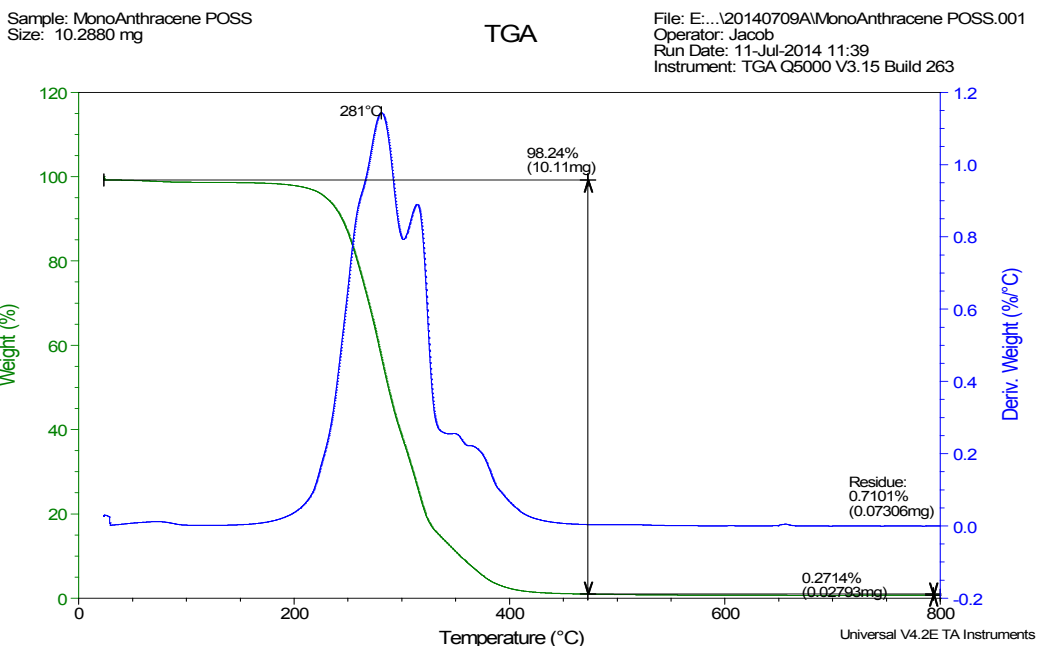

Figure S2: (a) TGA curve of POSS-ANT

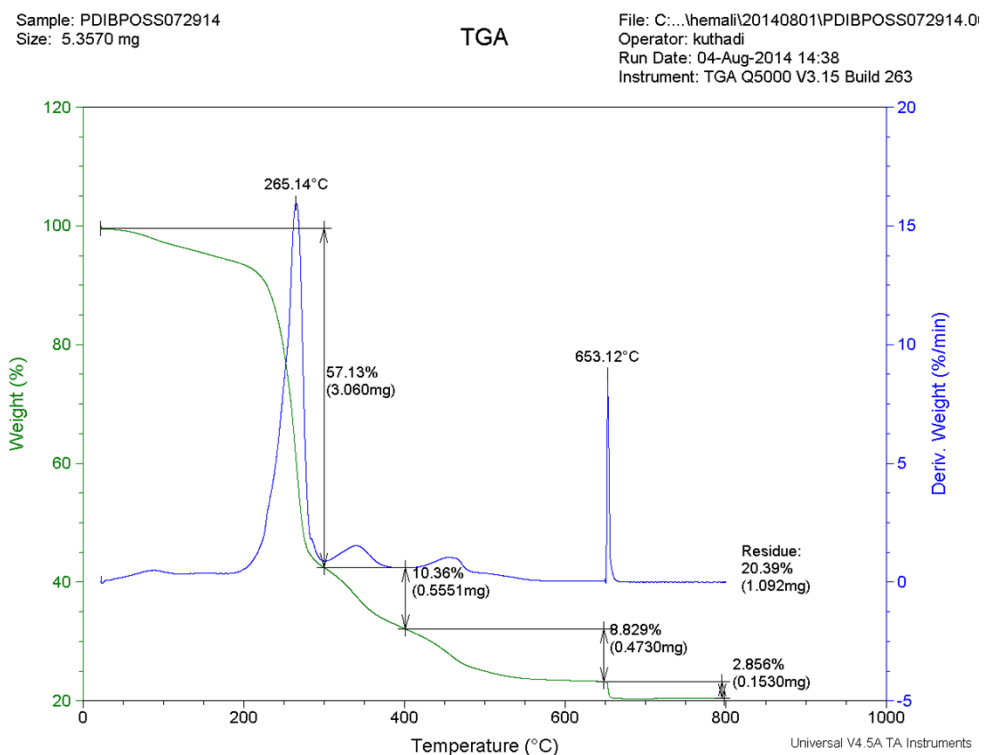

Figure S2: (b) TGA curve of POSS-PDI-POSS

**Figure S3:** UV-visible spectra for the dilution series of POSS-PDI-POSS.

**Figure S4:** IV curves for drop casted films of POSS-ANT (left) and POSS-PDI-POSS (right) at room temperature and at 50 °C

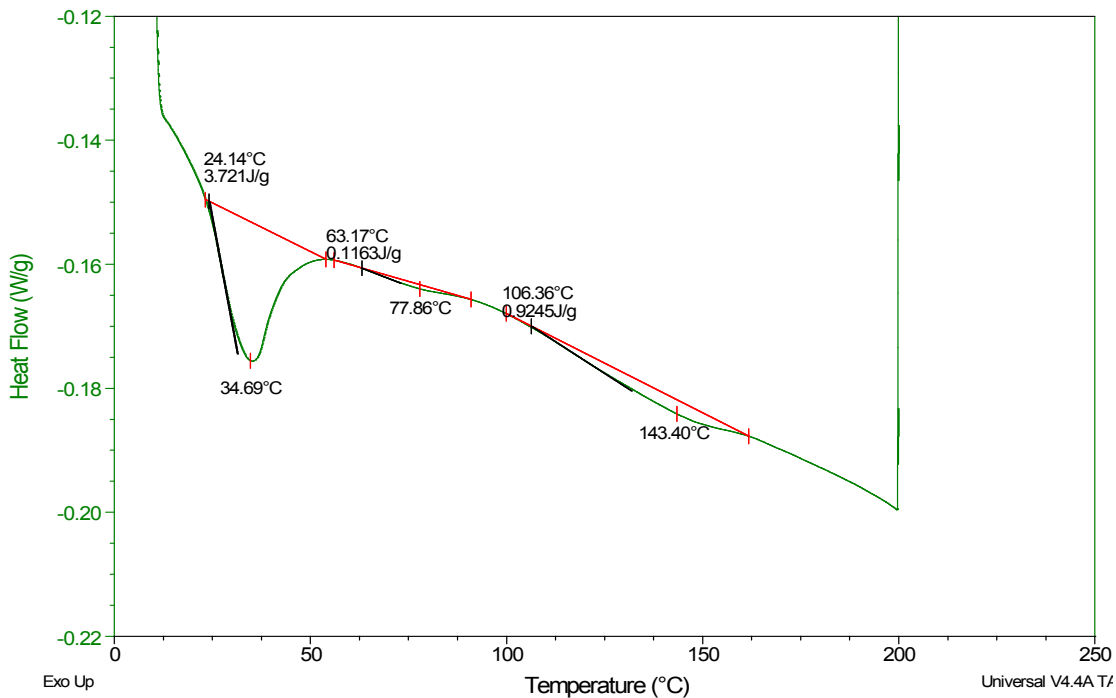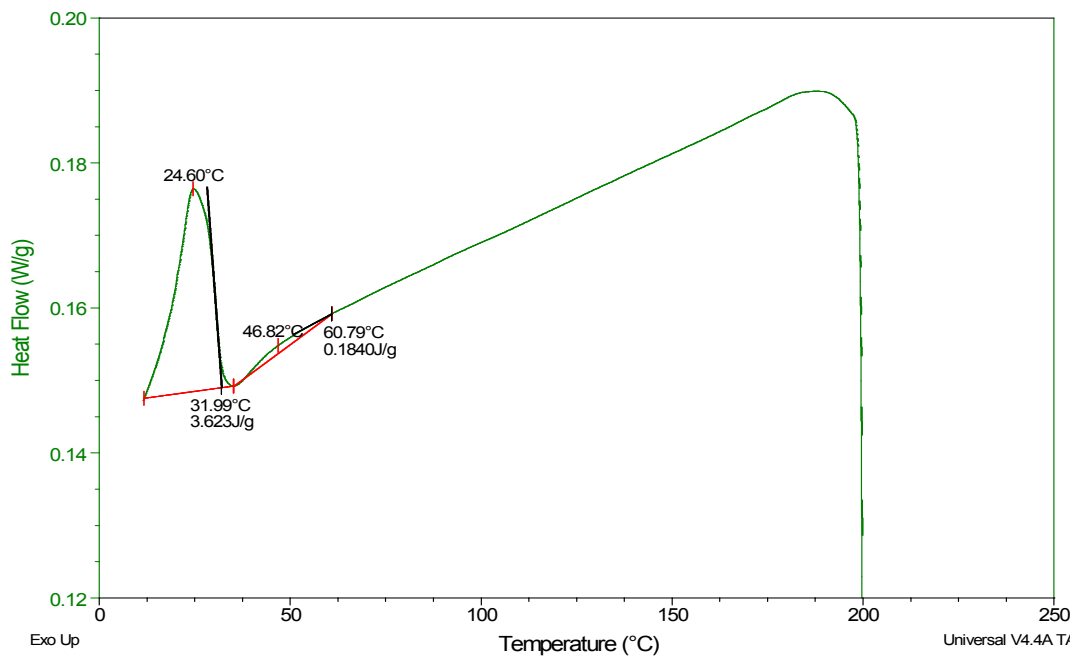

**Figure S5:** Heating (top) and cooling (bottom) curves of DSC traces for POSS-ANT

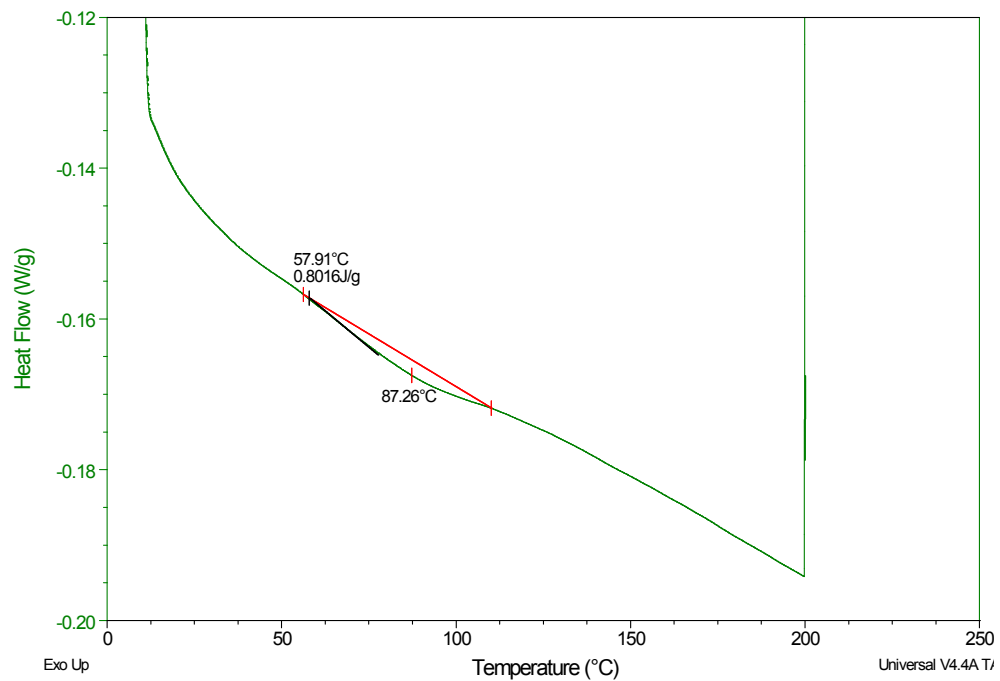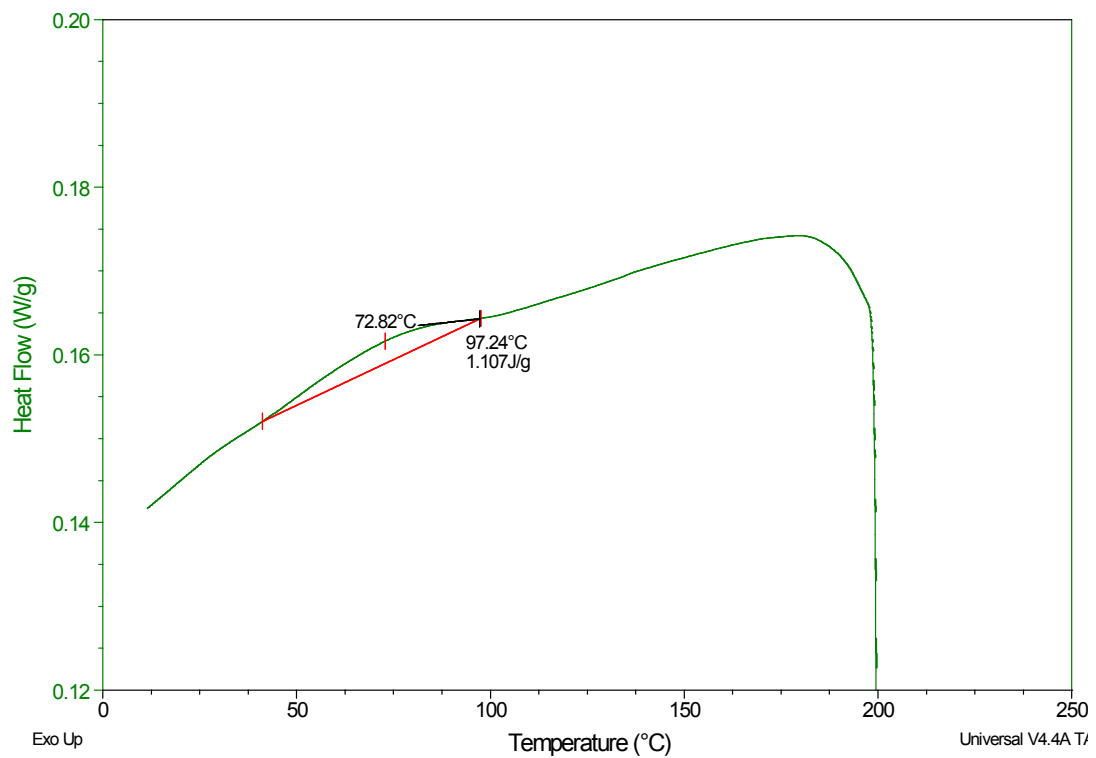

**Figure S6:** Heating (top) and cooling (bottom) curves of DSC traces for POSS-PDI-POSS.

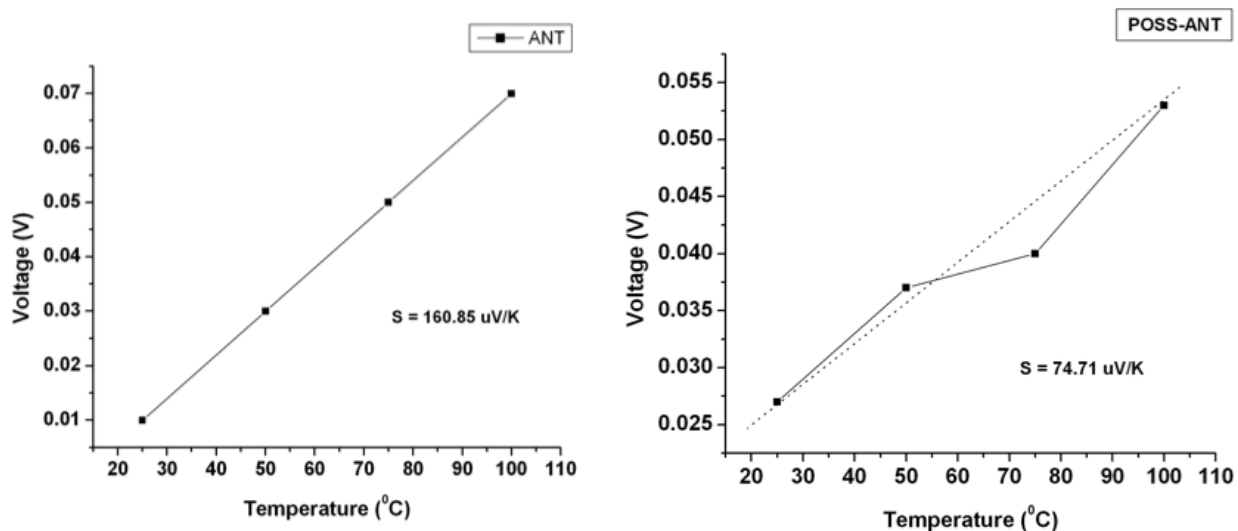

**Figure S7:** Voltage vs temperature curves for spin coated (right) and drop casted (left) films of POSS-ANT

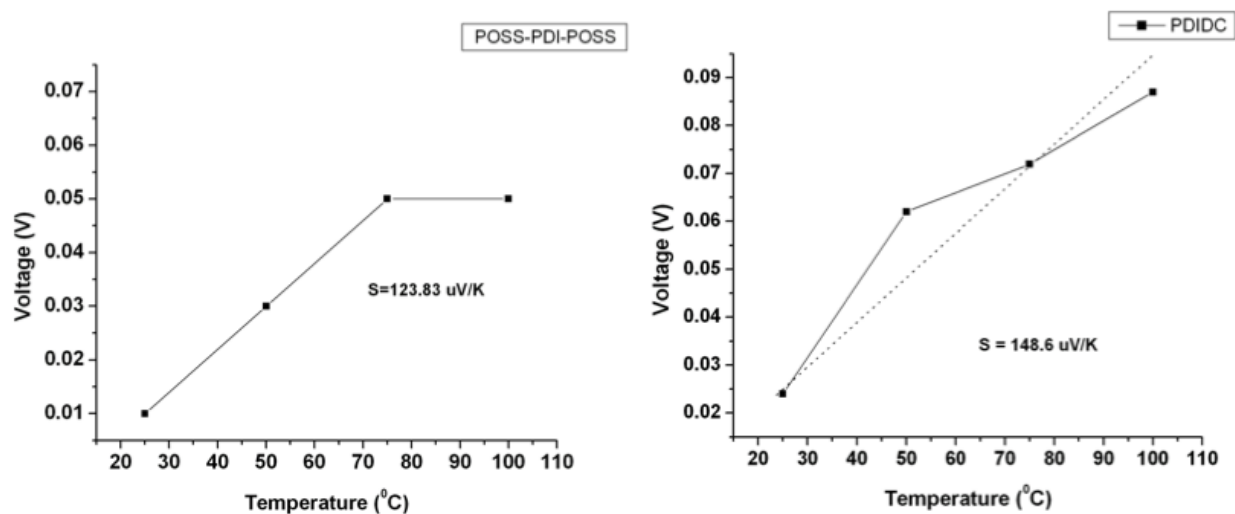

**Figure S8:** Voltage vs temperature curves for spin coated (right) and drop casted (left) films of POSS-PDI-POSS

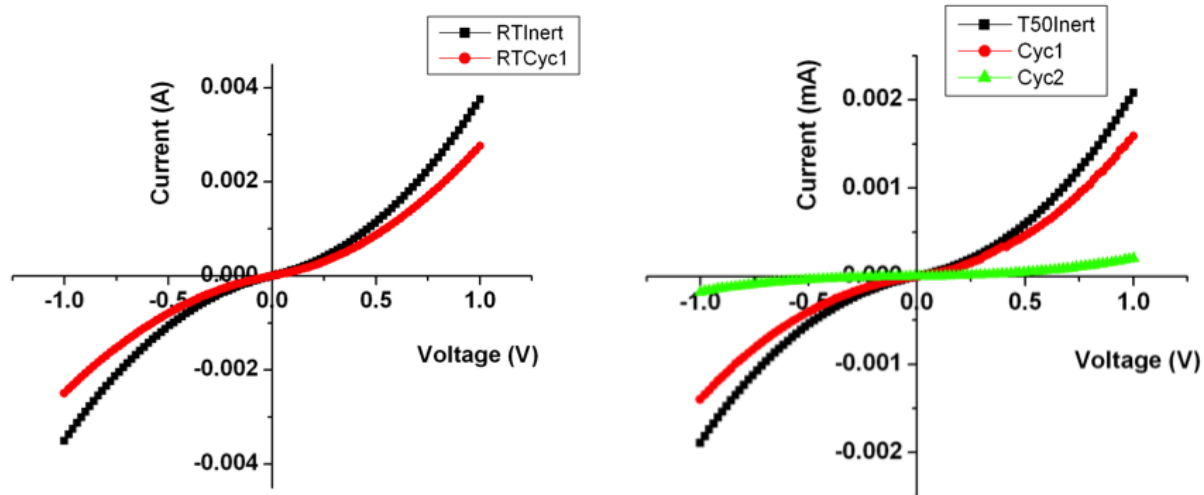

**Figure S9:** Comparison IV plots obtained in inert atmosphere and in open air while two cycles of heating and cooling.

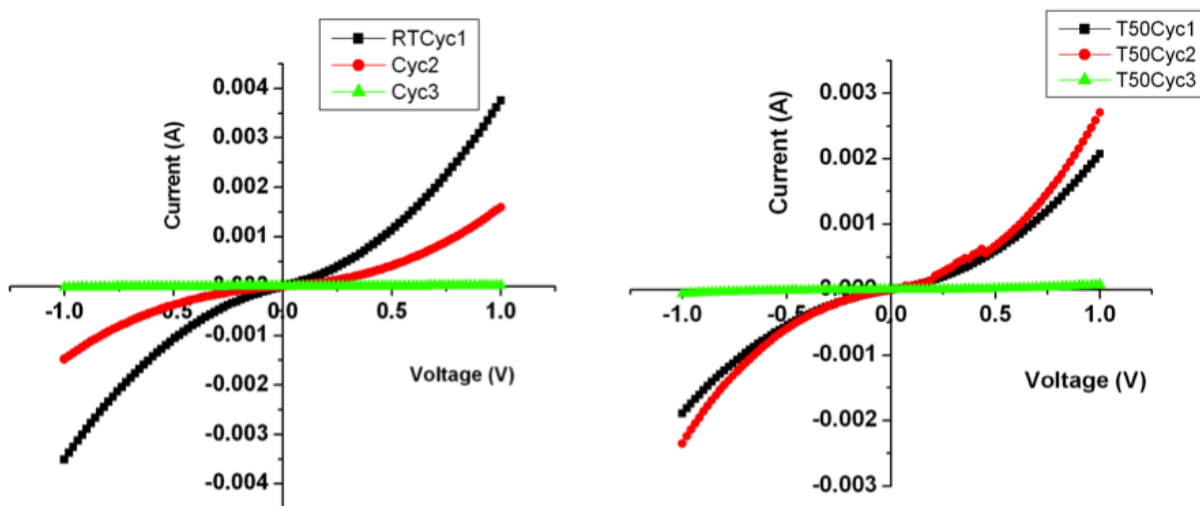

**Figure S10:** Comparison IV plots obtained in inert atmosphere while three cycles of heating to 50 °C and cooling to room temperature.

**IR traces of POSS-ANT**

**IR traces of POSS-PDI-POSS**

**Figure S11:** IR traces of POSS-ANT and POSS-PDI-POSS after annealed to 50, 75, and 100 °C



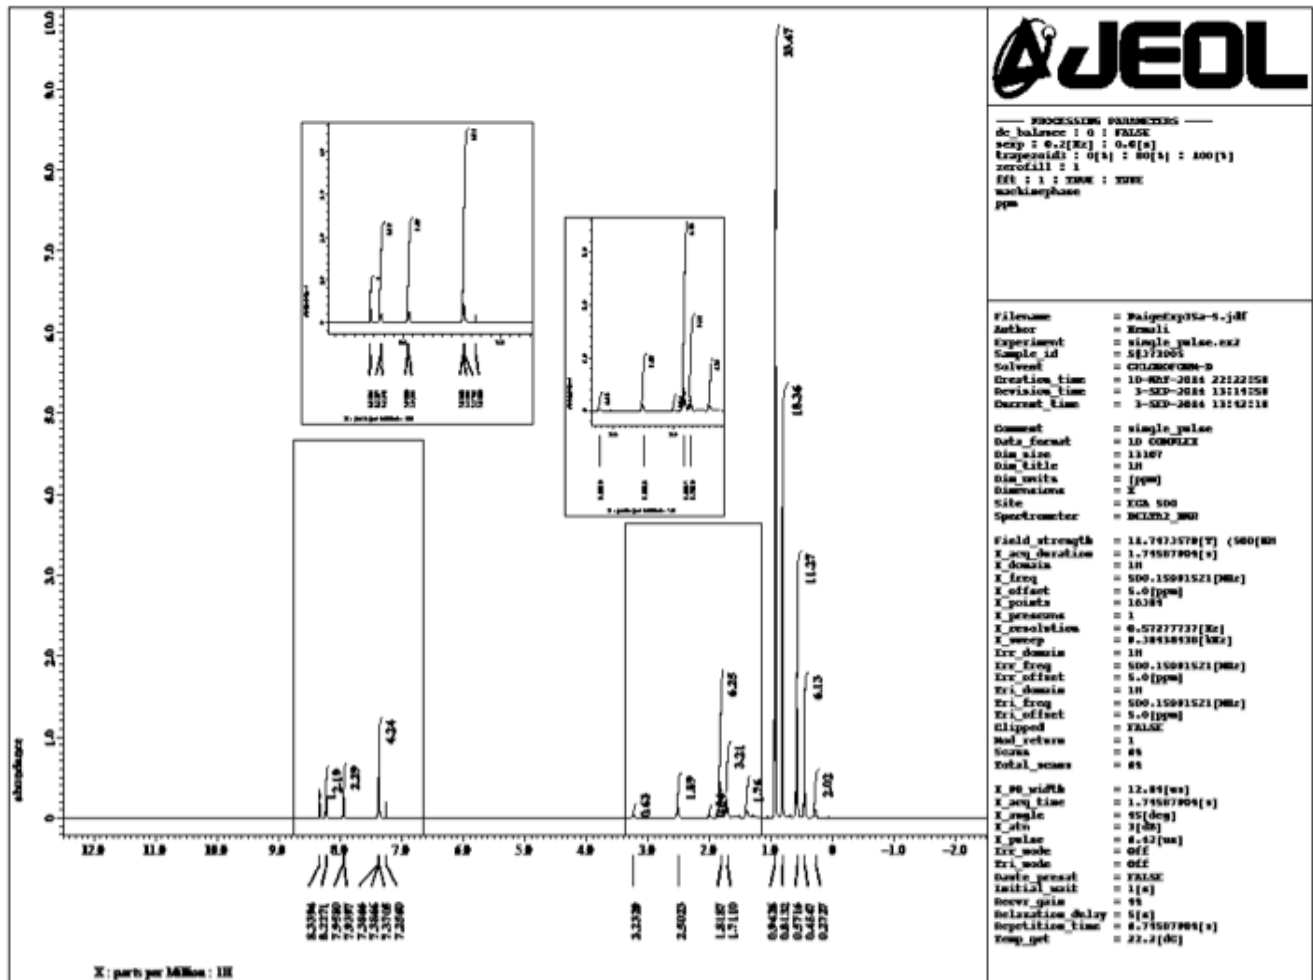

Figure S12: <sup>1</sup>H-NMR spectrum of POSS-ANT.

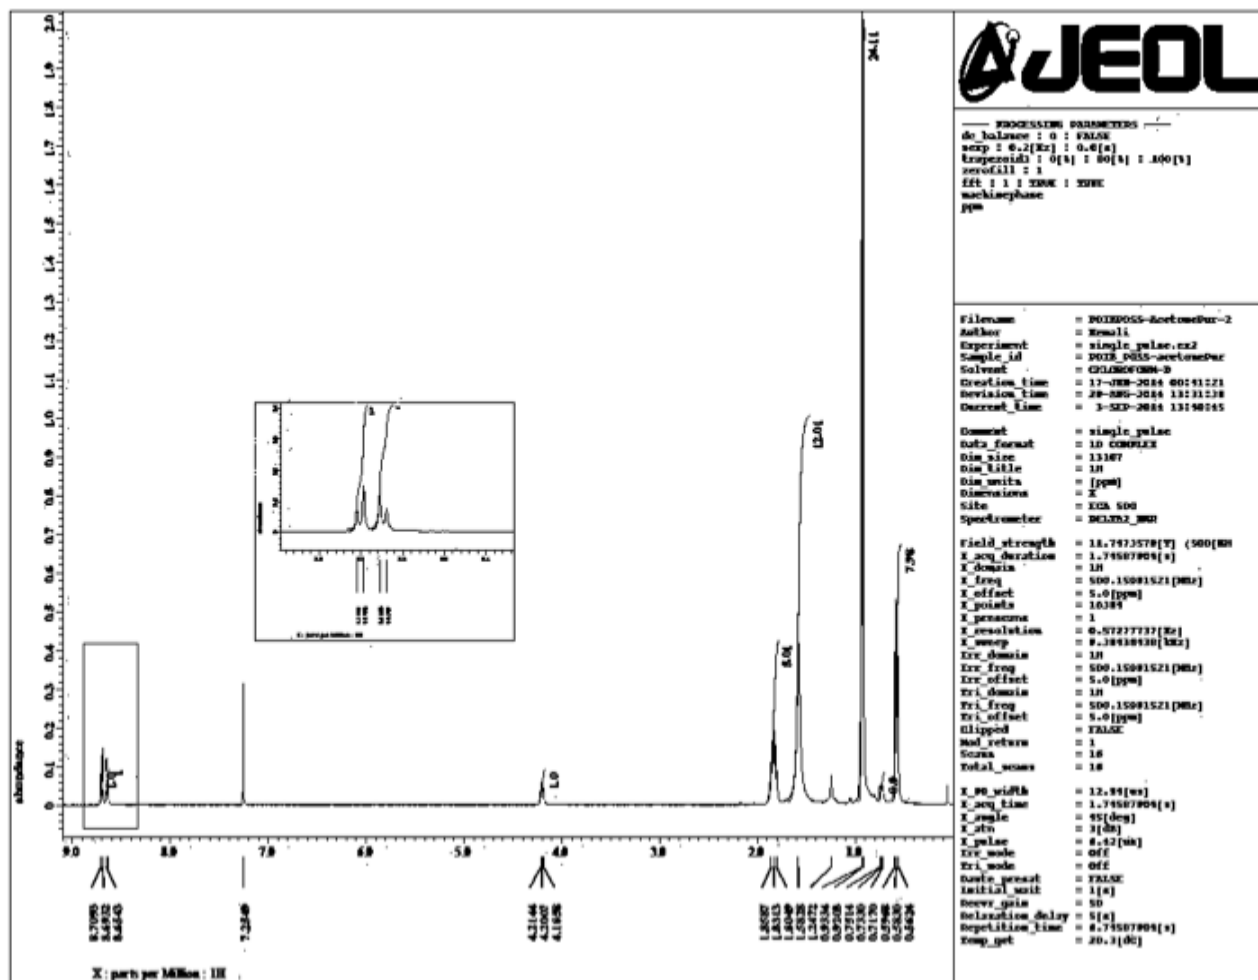

Figure S13: <sup>1</sup>H-NMR spectrum of POSS-PDI-POSS.
